1 **Complete mitochondrial genomes do not distinguish phenotypically distinct lineages of**  
2 **Andean *Coeligena* hummingbirds**

3

4 **Running title: Distinct hummingbird species share mitogenomes**

5 Catalina Palacios<sup>1</sup>, Leonardo Campagna<sup>2,3</sup>, Juan Luis Parra<sup>4</sup>, Carlos Daniel Cadena<sup>1</sup>

6 <sup>1</sup> Laboratorio de Biología Evolutiva de Vertebrados, Departamento de Ciencias Biológicas,  
7 Universidad de Los Andes, Carrera 1 No. 18 A 10, Bogotá, Colombia

8 <sup>2</sup> Department of Ecology and Evolutionary Biology, Cornell University, Ithaca, New York, USA

9 <sup>3</sup> Fuller Evolutionary Biology Program, Cornell Lab of Ornithology, Cornell University, Ithaca,  
10 New York, USA

11 <sup>4</sup> Grupo de Ecología y Evolución de Vertebrados, Instituto de Biología, Universidad de  
12 Antioquia, Calle 67 No. 53-108, Medellín, Colombia

13 **Corresponding author**

14 Catalina Palacios

15 [dc.palacios10@uniandes.edu.co](mailto:dc.palacios10@uniandes.edu.co)

16 Laboratorio de Biología Evolutiva de Vertebrados, Departamento de Ciencias Biológicas,  
17 Universidad de Los Andes, Carrera 1 No. 18 A 10, J303, Bogotá, Colombia.

18 Telephone: +(571) 3394949 ext. 3755. Cellular phone: +(57) 3112833757

19 Alternative e-mail: [palaciosdcata@gmail.com](mailto:palaciosdcata@gmail.com)

20

21 **Abstract**

22 Lack of divergence in mitochondrial DNA between species with clear phenotypic differences  
23 may be the result of low resolution of markers, incomplete lineage sorting, introgression, or the  
24 interplay of various evolutionary mechanisms acting on different traits and genomic regions  
25 through time. Previous work revealed that the Andean hummingbirds *Coeligena bonapartei* and  
26 *C. helianthea* lack genetic divergence in the mitochondrial *ND2* gene, which shows variation  
27 discordant with coloration phenotype but consistent with geography. We sequenced and analyzed  
28 complete mitochondrial genomes for *C. b. bonapartei*, *C. b. consita*, *C. h. helianthea* and *C. h.*  
29 *tamai* to assess whether patterns revealed by *ND2* analyses hold when considering the entire  
30 mitogenome, and to shed light into the evolutionary history of these hummingbirds. We found  
31 very low genetic differentiation in mitogenomes among the four lineages of *Coeligena*,  
32 confirming patterns based on *ND2* data. Estimates of genetic differentiation, phylogenies and  
33 haplotype network analyses of complete mitogenomes did not separate phenotypically distinct  
34 taxa, but were consistent with a previously described pattern of northern vs. southern divergence  
35 along the Cordillera Oriental of Colombia. Mitogenomes of *C. b. bonapartei* and *C. h. helianthea*  
36 are indistinguishable, suggesting incomplete lineage sorting or strong introgression.  
37 Mitogenomes of *C. b. consita* and *C. h. tamai* are slightly differentiated, but they are more  
38 similar to each other than either is to that of its respective nominate subspecies, a result also  
39 suggestive of mtDNA introgression despite distinct phenotypic differences. Our results indicate  
40 that various evolutionary mechanisms playing out over a complex biogeographic scenario in the  
41 Colombian Andes drove divergence in phenotypes and mitochondrial genomes of *Coeligena*  
42 hummingbirds, and lead to alternative hypotheses to be tested with whole-genome analyses.

## 43 **1. Introduction**

44 In the early days of sequence-based molecular systematics, mitochondrial DNA (mtDNA) was  
45 the marker of choice for most studies of population genetics, phylogenetics and phylogeography  
46 of animals because mtDNA is a haploid non-recombinant molecule almost free of non-coding  
47 regions, inherited via the maternal line, and abundant in tissues (Awise et al., 1987; Galtier et al.,  
48 2009; Wilson et al., 1985). Also, mtDNA evolves largely neutrally at a fast rate allowing one to  
49 find distinctive haplotypes among lineages (Awise et al., 1987; Ballard and Whitlock, 2004).

50 However, mtDNA does not always reflect the evolutionary history of lineages owing to  
51 evolutionary and demographic processes such as selection, or differences between paternal and  
52 maternal dispersal and gene flow (Ballard and Melvin, 2010; Edwards et al., 2005; James et al.,  
53 2017). Thus, researchers have turned to assaying nuclear markers alongside mtDNA to study the  
54 divergence of lineages, an approach becoming increasingly feasible with the development of  
55 sequencing technologies allowing one to assay and analyze large numbers of genetic markers at  
56 relatively low cost (Kraus and Wink, 2015; Oyler-McCance et al., 2016; Toews et al., 2016).  
57 Information on genome-wide variation has not only contributed to more robust inferences of  
58 relationships among lineages as well as insights about how evolutionary mechanisms drive such  
59 divergence, but has also shed light on how evolutionary mechanisms interact to shape patterns of  
60 genetic divergence across genomes (Bonnet et al., 2017; Toews and Brelsford, 2012).

61 Phenotypes, nuclear genomes and mitochondrial genomes are not always equally divergent  
62 among lineages. When divergence is mainly driven by genetic drift, mtDNA is expected to  
63 diverge at a faster rate than nuclear DNA – and nuclear-encoded phenotypes – because the  
64 effective population size of the former is lower (Ballard and Whitlock, 2004; Moore, 1995).  
65 However, when selection drives divergence among populations, mtDNA need not diverge sooner  
66 than the nuclear genome, resulting in cases where patterns of mitochondrial and nuclear  
67 differentiation are not coincident or where phenotypic differentiation exists with little to no  
68 mitochondrial differentiation. Furthermore, phenotypically distinct populations may share  
69 mtDNA haplotypes because of mitochondrial introgression due to gene flow after divergence  
70 (Irwin et al., 2009; Rheindt et al., 2011; Toews and Brelsford, 2012).

71 Morphology, plumage, and songs are commonly used to compare populations and inform the  
72 species-level taxonomy of birds (Edwards et al., 2005; Remsen, 2005). Morphological

73 measurements may provide evidence of barriers to gene flow (Cadena et al., 2018), whereas  
74 visual and acoustic signals are key phenotypes for species delimitation because they are involved  
75 in species recognition and reproductive isolation (Price, 2008; Roulin, 2004; Uy et al., 2009).  
76 Studies on Neotropical birds often show concordance in differentiation among lineages in  
77 phenotype and mitochondrial markers (e.g. Gutiérrez-Pinto et al., 2012; Lovette et al., 2010;  
78 Ribas et al., 2012; Sedano and Burns, 2010; Valderrama et al., 2014; Winger and Bates, 2015),  
79 although several examples exist of groups in which mtDNA is highly structured in distinct  
80 lineages despite little variation in plumage (Cadena et al., 2019; Chesser et al., 2020; D'Horta et  
81 al., 2013; Valderrama et al., 2014). Cases documenting species with marked differences in  
82 plumage coloration and little mitochondrial genetic divergence are more scarce (Campagna et al.,  
83 2012; Loughheed et al., 2013; Luna et al., 2017).

84 Among hummingbirds (Trochilidae), concordance between mtDNA divergence and overall  
85 differences in coloration between species and populations appears to be the norm (Chaves et al.,  
86 2007 *Adelomyia*; Jiménez and Ornelas, 2016 *Amazilia*; McGuire et al., 2008 Trochilidae; Ornelas  
87 et al., 2014 *Amazilia*; Parra et al., 2009 *Coeligena*; Zamudio-Beltrán and Hernández-Baños,  
88 2018, 2015 *Laprolamia* and *Eugenes*). mtDNA divergence often coincides with differences in  
89 coloration among hummingbirds even when phenotypic variation is subtle, such as in the color of  
90 the crown, gorget, or tail (Benham and Witt, 2016 *Metallura*; Gonzalez et al., 2011 *C.*  
91 *curvipennis*; Lozano-Jaramillo et al., 2014 *Antocephala*; Ornelas et al., 2016 *Lampornis*; but see  
92 Rodríguez-Gómez and Ornelas, 2015 *Amazilia*; Sornoza-Molina et al., 2018 *Oreotrochilus*).

93 There are, to our knowledge, only two documented cases of hummingbirds showing lack of  
94 genetic divergence with marked differentiation in coloration ( i.e. differences in color in various  
95 plumage patches; Eliason et al., 2020; Parra, 2010), both occurring in the high Andes. One case  
96 involves two species of *Metallura* metaltails (Benham et al., 2015; García-Moreno et al., 1999,  
97 *Metallura theresiae* and *M. eupogon*) and the other two species of starfrontlets in the genus  
98 *Coeligena* (Palacios et al., 2019; Parra et al., 2009) which we focus on in this study.

99 The Golden-bellied Starfrontlet (*C. bonapartei*) and the Blue-throated Starfrontlet (*C. helianthea*)  
100 inhabit the Northern Andes of Colombia and Venezuela (Figure 1A). The nominate subspecies of  
101 these species are sympatric in the southern part of their ranges in the Cordillera Oriental, whereas  
102 subspecies *C. b. consita* and *C. h. tamai* are allopatric in the Serranía de Perijá and Tamá Massif,

103 respectively. These species are strikingly different in structural plumage coloration (Eliason et al.,  
104 2020; Sosa et al., 2020): *C. bonapartei* is greenish with fiery golden underparts whereas *C.*  
105 *helianthea* is blackish with a rose belly and aquamarine rump. Despite their markedly different  
106 phenotypes, *C. bonapartei* and *C. helianthea* are not genetically distinct in a mitochondrial gene  
107 (*ND2*), in a gene involved in the melanogenesis pathway (Melanocortin 1 Receptor *MC1R*), nor  
108 in regions flanking ultra-conserved elements (UCEs) across the nuclear genome (Palacios et al.,  
109 2019). Although these hummingbirds occupy similar environments, their lack of genetic  
110 differentiation is consistent with divergence with gene flow (Palacios et al., 2019). Phylogenetic  
111 analyses of sequences of the *ND2* mitochondrial gene also suggest that *C. b. consita* and *C. h.*  
112 *tamai* are more closely related to each other than either is to their nominate subspecies, a pattern  
113 more consistent with geography than with phenotype and taxonomy. However, it is unclear  
114 whether lack of genetic differentiation between *C. bonapartei* and *C. helianthea* is restricted to  
115 *ND2* or if it is a general pattern across the mitochondrial genome. Other mitochondrial markers  
116 may be more variable owing to differences among regions in substitution rates (e.g. *ND4* or the  
117 control region, Arcones et al., 2019; Eo and DeWoody, 2010) or in selective or stochastic  
118 demographic processes (Morales et al., 2015; Wort et al., 2017). Examining complete  
119 mitochondrial genomes might thus reveal heretofore undetected differences between species of  
120 *Coeligena*. Alternatively, if complete mitogenomes confirm lack of genetic divergence between  
121 *C. bonapartei* and *C. helianthea*, and that relationships of lineages of these species are  
122 inconsistent with their phenotype, then further consideration of mechanisms underlying  
123 evolutionary divergence in mtDNA and coloration in the group would be necessary. Such  
124 mechanisms potentially include natural and sexual selection as well as demographic processes  
125 acting during periods of geographic isolation and contact among lineages (Krosby and Rohwer,  
126 2009; Morales et al., 2017; Pons et al., 2014; Toews et al., 2014).

127 We sequenced and assembled complete mitochondrial genomes of multiple individuals to address  
128 the following questions: (1) Are the sequence and structure of the mitochondrial genomes of *C.*  
129 *bonapartei* and *C. helianthea* like those of mitogenomes of other bird and hummingbird species?  
130 (2) Is the lack of genetic divergence between *C. bonapartei* and *C. helianthea* a general pattern  
131 across the mitochondrial genome? (3) Are phylogenetic relationships of lineages of *C. bonapartei*  
132 and *C. helianthea* based on *ND2* also recovered using complete mitochondrial genomes? (4) Are  
133 different genes and regions in the mitochondrial genome equally informative about lineage

134 relationships? And, (5) Are there substitutions in mitochondrial protein-coding genes among  
135 lineages of *C. bonapartei* and *C. helianthea* involving changes between aminoacids with different  
136 functional characteristics which may suggest selection acting on these genes?

## 137 **2. Material and methods**

### 138 ***2.1. Samples and sequencing***

139 We sampled 46 individuals, 23 each of *C. bonapartei* and *C. helianthea* (Supplementary Table  
140 1), representing subspecies *C. b. bonapartei*, *C. b. consita*, *C. h. helianthea*, and *C. h. tamai*.  
141 Taxon identities were assigned by determination of specimens in the museum or by geography.  
142 Because previous work indicated that populations from the Mérida Cordillera of Venezuela often  
143 referred to *C. bonapartei* (subspecies *C. b. eos*) are genetically divergent from other populations  
144 in the complex (Palacios et al. 2019), we did not consider them in this study. Muscle tissue  
145 samples from voucher specimens were obtained from the collections of the Instituto Alexander  
146 von Humboldt (IAvH) and the Museo de Historia Natural de la Universidad de los Andes  
147 (ANDES). We employed relatively even samples sizes of each sex and subspecies of both *C.*  
148 *bonapartei* and *C. helianthea*.

149 We extracted total genomic DNA using a phenol/chloroform method and Phase-Lock Gel tubes,  
150 followed by a standard cleaning protocol employing magnetic beads. We prepared 46 Illumina  
151 TruSeq Nano DNA-enriched libraries following the manufacturer's protocol for low-throughput  
152 configuration and 550bp insert size. We quantified the libraries using a Qubit fluorometer.  
153 Normalizing, pooling and sequencing were done by the Genomics Facility of the Institute of  
154 Biotechnology at Cornell University. Sequencing was performed using two lanes of NexSeq 500  
155 2x150 paired end. We filtered the raw data by quality according to Illumina instructions, checked  
156 reads using Fastqc (Andrews, 2010), and cleaned them to remove adapters using  
157 AdapterRemoval (Schubert, Lindgreen, & Orlando, 2016).

### 158 ***2.2. Assembly and annotation of mitochondrial genomes***

159 Although our sequence data contained sequences originating from both the nuclear and  
160 mitochondrial genomes, here we focus specifically on the later. We used MITObim v.1.9.1 (Hahn  
161 et al., 2013) with default parameters to assemble complete mitochondrial genomes from filtered  
162 reads following two alternative assembling strategies based on using different baits: (1) two

163 independent assemblies using as baits the complete mitochondrial genomes of *Oreotrochilus*  
164 *melanogaster* and *Heliodoxa aurescens* (Genbank NC027454 and KP853094, respectively), and  
165 (2) a third assembly using as bait the *ND2* gene sequence for each individual -or a related one-  
166 available from previous work (Palacios et al., 2019). We expected that the first strategy would  
167 allow us to recover more complete individual mitogenome sequences because during initial  
168 iterations, reads would map to different sites on the reference mitogenome and this would allow  
169 extension from multiple edges. In turn, we expected that the gene-bait strategy would enable us to  
170 identify structural changes in genomes because it would allow extension only from the two edges  
171 of the gene, but it would likely be susceptible to recovering incomplete sequences when reads did  
172 not overlap, impeding continued extension.

173 The gene-bait strategy required multiple independent rounds of assembling. In each round we  
174 used as bait a new fragment obtained from the final genome assembled in the previous round. We  
175 compared the results from each strategy to determine the sequence and structure of mitogenomes  
176 of *C. bonapartei* and *C. helianthea*. In addition, we mapped the read-pool obtained from the  
177 complete-genome assembling strategy against the mitogenome sequence obtained from the gene-  
178 bait strategy using the “map to reference assemble” tool in Geneious 9.1.5  
179 (<http://www.geneious.com>; Kearse et al., 2012). We used these map-to-reference assemblies to  
180 close gaps in some sequences, to check the number of repetitions at the end of the control region  
181 (see results), and to verify assigned alleles in each sequence at polymorphic sites. We aligned and  
182 edited mitochondrial genomes using ClustalO (Sievers et al., 2011) and manually in Geneious,  
183 and annotated them using MITOS beta version (<http://mitos2.bioinf.uni-leipzig.de/index.py>) and  
184 Geneious. In addition to the alignment of complete mitogenomes, for phylogenetic and  
185 population genetic analyses described below we generated alignments of each protein-coding  
186 gene (PCG), and a concatenated alignment of 13 PCGs (*ND1*, *ND2*, *COX1*, *COX2*, *ATP8*, *ATP6*,  
187 *COX3*, *ND3*, *ND4L*, *ND4*, *ND5*, *CYTB*, and *ND6*).

#### 188 **2.4. Population genetic, phylogenetic, and amino-acid change analyses**

189 Using the alignment of complete mitogenomes, we calculated nucleotide diversity ( $\pi$ ) for all  
190 sequences as a unit, and separately for *C. bonapartei*, *C. helianthea*, and for each of the four  
191 subspecies (*C. b. bonapartei*, *C. b. consita*, *C. h. helianthea*, *C. h. tamai*). We calculated absolute  
192 genetic divergence ( $D_{xy}$ ) in DnaSP v6 (Rozas et al., 2017), and relative genetic divergence ( $F_{st}$ )

193 between species and among subspecies assessing significance with 1,000 permutations using R  
194 package Hierfstat (Goudet and Jombart, 2015; R Core Team, 2017).

195 We examined phylogenetic relationships among individuals based on each of our alignments  
196 using maximum-likelihood analysis and computed majority-rule consensus trees in RAxML  
197 v8.2.12 (Stamatakis, 2014). We used the GTR+GAMMA model and multiparametric  
198 bootstrapping stopped by the autoMRE criterion. We used mitochondrial genomes of  
199 *Oreotrochilus melanogaster* and *Heliodoxa aurescens* (Genbank NC027454 and KP853094,  
200 respectively) as outgroups. We also built a median-joining haplotype network (Bandelt et al.,  
201 1999) in PopArt (Leigh and Bryant, 2015) using the complete mitogenome alignment.

202 Finally, we assessed whether there are fixed changes in amino-acids in proteins encoded in the  
203 mitogenome of lineages of *C. bonapartei* and *C. helianthea* potentially suggestive of selection.  
204 We first calculated the number and type of substitutions in each protein coding gene in DnaSP v6  
205 (Rozas et al., 2017). Then, for each non-synonymous substitution we examined whether amino-  
206 acid variants were from different functional groups.

### 207 **3. Results**

#### 208 ***3.1. Sequence and structure of mitochondrial genomes in C. bonapartei and C. helianthea***

209 We recovered very similar sequence assemblies using the gene-bait and the complete  
210 mitogenome bait strategies. However, using the complete mitogenome strategy we observed  
211 insertions in some mitogenomes not recovered with the gene-bait strategy. Additionally, we  
212 found minor differences between assemblies obtained using the two strategies mainly in the  
213 length and sequence of the control region. We used the read-pool map-to-reference assemblies to  
214 resolve discrepancies between sequences from different assemblies and to review and manually  
215 correct nucleotide assignments in variant sites.

216 We recovered complete mitochondrial genomes for 42 of the 46 specimens (excluding IDs 23,  
217 24, 26 and 33 in Supplementary Table 1, which we do not consider further because the data we  
218 obtained were of low quality), with an average coverage of 127.5x for all genomes (Max 1,555.7,  
219 Min 11.8, see Supplementary Table 1 for details, GenBank accession numbers XXX to XXX).  
220 The size of the mitochondrial genome of *C. bonapartei* and *C. helianthea* varied from 16,813 bp  
221 to 16,859 bp, mainly due to individual variation in length of a repetitive motive ('AAAC') at the



222 end of the control region (beginning at 16,759 bp in the alignment). The 42 sequences were  
223 identical across 16,560 bp (98.2%), showed 248 variant sites (1.5%), with 51 positions having  
224 gaps or being ambiguous (0.3%). Mean pairwise identity was 99.7%, and total GC content was  
225 44.8%. On average, the mitogenome sequences of *Coeligena* were identical to those of *O.*  
226 *melanogaster* across 14,555 bp (86.0%) and to those of *H. aurescens* across 14,450 bp (85.6%).  
227 The beginning of the control region (~350 bp) was the most difficult to align between sequences  
228 of *Coeligena* and those of outgroups. The mitochondrial genome structure of *Coeligena* species  
229 followed the typical pattern observed in other birds including hummingbirds, with 2 ribosomal  
230 RNAs, 13 protein coding genes, 22 transfer RNAs, and the control region (Figure 2).

### 231 **3.2. Genetic divergence and clustering patterns among lineages of *C. bonapartei* and *C.*** 232 ***helianthea***

233 Across the complete mitogenome alignment including all individuals of *C. bonapartei* and *C.*  
234 *helianthea*, we found only 250 mutations (two sites had 3 alleles) in 248 variable sites (1.5% of  
235 the genome). Of these variable sites, 89 were singletons and 159 were parsimony-informative.  
236 Nucleotide diversity was low in the complete alignment ( $P_i = 0.00247$ ,  $SD = 0.00013$ ). The least  
237 diverse lineage was *C. b. consita* ( $P_i = 0.00019$ , 9 polymorphic sites), followed by *C. h.*  
238 *helianthea* ( $P_i = 0.00084$ , 40 polymorphic sites), *C. h. tamai* ( $P_i = 0.00124$ , 98 polymorphic  
239 sites), and *C. b. bonapartei* ( $P_i = 0.00254$ , 156 polymorphic sites). When we compared groupings  
240 based on species assignment (i.e. *C. bonapartei* vs *C. helianthea*), we found low relative genetic  
241 divergence ( $F_{st} = 0.076$ ,  $p = 0.016$ ). However,  $F_{st}$  values were greater when considering the four  
242 lineages separately (Table 1), with comparisons between lineages assigned to the same species  
243 showing higher relative genetic divergence than those between lineages assigned to different  
244 species (e.g. *C. b. consita* vs *C. b. bonapartei*  $F_{st} = 0.385$ ,  $p$ -value  $< 0.001$ ; *C. h. helianthea* vs *C.*  
245 *h. tamai*  $F_{st} = 0.518$ ,  $p < 0.001$ ; *C. b. bonapartei* vs *C. h. helianthea*  $F_{st} = 0.083$ ,  $p = 0.1$ ). All  
246 comparisons indicated low absolute genetic divergence ( $D_{xy}$ ), supporting the general lack of  
247 genetic differentiation in the mitogenomes of these species (Table 1). However, high values of  
248 relative genetic divergence ( $F_{st}$ ) between lineages of *C. bonapartei* and *C. helianthea* suggested  
249 genetic structure.

250 Phylogenetic analyses of the complete mitogenome alignment clustered all sequences of  
251 *Coeligena* hummingbirds in a well-supported clade (maximum-likelihood bootstrap ML-bs

252 100%, Figure 1). Relationships within this clade were unresolved, with a polytomy comprising  
253 (1) a clade grouping all sequences of *C. b. consita* (ML-bs 97%), (2) a clade grouping all but one  
254 of the sequences of *C. h. tamai* (ML-bs 90%), and (3) the remaining sequences (mostly of *C. b.*  
255 *bonapartei* and *C. h. helianthea*) scattered in smaller clades or by themselves. Phylogenies built  
256 with other alignments (each PCG and concatenated PCGs, Figure S1) showed lower resolution  
257 (i.e. more polytomies or lower support values). In most phylogenies, *C. b. consita* and *C. h. tamai*  
258 were more closely related to each other than either was to the nominate subspecies, but most  
259 support values for this grouping were lower than 80% except in the control-region phylogeny  
260 (ML-bs 88%).

261 All sequences of *C. b. consita* clustered together in the the median-joining haplotype network  
262 (Figure 1). All sequences but one of *C. h. tamai* clustered in another group which was close to,  
263 but distinguishable from, two sequences of *C. b. bonapartei* (ID 12 and 15). The remaining  
264 sequences of *C. b. bonapartei*, all sequences of *C. h. helianthea*, and the remaining sequence of  
265 *C. h. tamai* (ID 40) clustered in a third group (Figure 1). The network showed that sequences of  
266 *C. b. consita* and *C. h. tamai* are more similar to each other than to *C. b. bonapartei* and *C. h.*  
267 *helianthea*. Also, two individuals of *C. b. bonapartei* (ID 10 and 14) with the same haplotype  
268 were highly divergent from all other individuals. *C. b. consita* was the lineage with the lowest  
269 number of haplotypes (4 among 9 individuals). In the other lineages, the number of haplotypes  
270 was similar to the number of individuals: 12 haplotypes in *C. b. bonapartei* (13 individuals), 6 in  
271 *C. h. helianthea* (7 individuals), and 13 in *C. h. tamai* (13 individuals).

272 Based on the clustering patterns described above, we defined genetic groups for additional  
273 analyses in which we calculated the number of substitutions and measures of genetic divergence  
274 among groups. First, we defined (1) a northern group comprising all sequences of *C. b. consita*,  
275 all sequences of *C. h. tamai* except ID 40, and two sequences of *C. b. bonapartei* (ID 12 and 15);  
276 and (2) a southern group including most sequences of nominate subspecies *C. b. bonapartei* and  
277 *C. h. helianthea* (except ID 10 and 14) and one sequence of *C. h. tamai* (ID 40). Second, we  
278 considered separately the groups of *C. b. consita* and *C. h. tamai* (excluding ID 40). There were  
279 only 27 substitutions (0.16%) yet high relative genetic divergence ( $F_{st} = 0.513$ ,  $p$ -value  $< 0.001$ )  
280 between the northern and southern groups. Likewise, there were 14 substitutions (0.083%) and  
281 genetic divergence was high ( $F_{st} = 0.502$ ,  $p$ -value  $< 0.001$ ) between *C. b. consita* and *C. h. tamai*.

282 The remaining 118 parsimony-informative sites existing among all sequences corresponded to  
283 intrapopulation diversity. Nucleotide diversity in the southern group ( $P_i = 0.0018$ ) was higher  
284 than that of *C. b. consita* ( $P_i = 0.00019$ ) and *C. h. tamai* (0.00089), but comparable to that of the  
285 northern group ( $P_i = 0.0012$ ).

286 Given a substitution rate of 0.00256 substitutions per site per lineage per million years (s/s/l/My)  
287 for the complete mitogenome of birds (Eo and DeWoody, 2010), we estimated that the northern  
288 and southern groups diverged around 310,000 years ago, and that *C. b. consita* and *C. h. tamai*  
289 diverged around 160,000 years ago. Based on 13 protein-coding genes plus the two rRNAs and a  
290 substitution rate of 0.00164 s/s/l/My (mean rate for Apodiformes; Arcones et al., 2019) estimates  
291 of divergence times are similar yet slightly older: 380,000 years ago between the northern and  
292 southern groups, and 180,000 years ago between *C. b. consita* and *C. h. tamai*.

### 293 **3.3. Functional aminoacid changes**

294 Of the total 248 variant sites, 160 were located in protein-coding genes (Table S2). The  
295 remaining 88 variant sites were in rRNAs (6 in 12SrRNA, 20 in 16SrRNA), tRNAs (11), inter-  
296 gene spacers (5), and the control region (46). Among the 160 variant sites in protein-coding  
297 genes, 123 corresponded to synonymous changes and 38 to non-synonymous changes. Most non-  
298 synonymous changes were singletons (23 sites) or varied within populations (11 sites). Of the  
299 remaining 4 variant sites, a non-synonymous change was shared between one individual of *C. b.*  
300 *bonapartei* and one individual of *C. h. tamai* (T↔C position 269 in *ND5*). Only three non-  
301 synonymous changes corresponded to substitutions between genetic groups. One change in *ND2*  
302 and one in *ND6* were fixed differences between the northern and the southern groups (G↔A  
303 position 475 in *ND2*, and G↔A position 112 in *ND6*). These non-synonymous substitutions do  
304 not imply any evident functional changes because both aminoacids involved (valine and  
305 isoleucine) are aliphatic, nonpolar, and neutral. Finally, a non-synonymous substitution between  
306 *C. b. consita* and all other sequences (A↔G position 145 in *ND4*) implies a functional change in  
307 aminoacids. Whereas *C. b. bonapartei*, *C. h. helianthea* and *C. h. tamai* had the aliphatic,  
308 nonpolar alanine, *C. b. consita* had the hydroxyl-containing, polar threonine. Note that this  
309 change is not between the two main mitogenome groups because *C. h. tamai* has the variant of  
310 the southern mitogenome group at this position.

#### 311 **4. Discussion**

312 We found that the complete mitochondrial genomes of two hummingbird species differing  
313 strikingly in phenotype, *C. bonapartei* and *C. helianthea*, are highly similar. Mitogenomes of a  
314 sample of 42 individuals representing both species and two subspecies recognized within each of  
315 them were 98.2% identical. Moreover, estimates of genetic differentiation and clustering analyses  
316 of mitogenome sequences were unable to recover groups corresponding to species, and suggested  
317 instead that mitogenomes of *C. b. consita* and *C. h. tamai* formed distinct clusters more similar to  
318 each other than either was to mitogenomes of the nominate subspecies *C. b. bonapartei* and *C. h.*  
319 *helianthea* which were, in turn, indistinguishable from each other. These results indicate that  
320 patterns of variation based on the *ND2* gene (Palacios et al., 2019) are consistent across the  
321 mitochondrial genome, implying that the previously documented lack of mtDNA divergence  
322 between species does not reflect insufficient data nor atypical variation in *ND2* relative to other  
323 mitochondrial markers. Instead, patterns of variation and relationships among the mitochondrial  
324 genomes of the four lineages are inconsistent with phenotypic variation and current taxonomy,  
325 but seem to agree partly with geography, considering that *C. b. consita* and *C. h. tamai* occur in  
326 the Serranía de Perijá and the north of the Cordillera Oriental whereas both nominate subspecies  
327 occur to the south along the cordillera.

328 The discordance between mitochondrial genomes and coloration phenotypes in *C. bonapartei* and  
329 *C. helianthea* can be accounted for by various evolutionary processes which must have acted over  
330 a relatively short period of time given divergence-time estimates for the group. Based on the *ND2*  
331 gene, the clade formed by *C. bonapartei* and *C. helianthea* diverged from *C. b. eos* around  
332 310,000 years ago, and the northern and southern clades comprising the four lineages of *C.*  
333 *bonapartei* and *C. helianthea* diverged around 240,000 years ago (Palacios et al., 2019). The  
334 latter estimate is more recent than our calculations of the divergence between the northern and  
335 southern groups at ca. 310,000 (complete mitogenome) or 380,000 years ago (PCG and rRNAs).  
336 Our estimates of divergence times must be interpreted with caution because different factors may  
337 bias them (Galtier et al., 2009; García-Moreno, 2004; Lovette, 2004), but they do suggest that the  
338 divergence between the northern and southern mitogenome groups, and the divergence between  
339 the mitogenomes of *C. b. consita* and *C. h. tamai* (160,000 estimated through complete

340 mitogenomes and, 180,000 years ago using the PCG and rRNAs) are recent, i.e. happening  
341 within the past 500,000 years.

342 Ours is the first study in hummingbirds using complete mitochondrial genomes for a population-  
343 level analysis of genetic structure between species and across geography we are aware of, and  
344 few complete mitochondrial genomes of hummingbirds have been published (Morgan-Richards  
345 et al., 2008; Prosdocimi et al., 2016; Souto et al., 2016). We searched GenBank for complete  
346 mitochondrial genomes of closely related hummingbirds with more than a single individual  
347 sequenced per species to compare their divergence with the divergence we observed in  
348 *Coeligena*. We only found six mitogenome sequences for three subspecies of *Amazilia versicolor*  
349 (*A. v. versicolor* KF624601, NC\_024156; *A. v. milleri* KP722042, NC033405; and *A. v.*  
350 *rondoniae* KP722041, NC\_033404; Prosdocimi et al., 2016) representing populations occurring  
351 over a broad geographic range. Overall, these sequences are much more differentiated (5.1% of  
352 sites were variable) than our entire data set (1.5%). Although this comparison is far from  
353 comprehensive, it does support the idea that the mitogenomes of the lineages of *Coeligena*  
354 hummingbirds are highly similar and their divergence is quite recent relative to other  
355 hummingbirds with comparable data, as also indicated by analyses of individual mtDNA genes  
356 (Palacios et al., 2019; Parra et al., 2009).

357 In contrast to mtDNA phylogenies, nuclear markers suggest *C. b. consita* was the first branch to  
358 diverge in the group, whereas *C. h. helianthea* and *C. h. tamai* are reciprocally monophyletic  
359 groups forming a clade sister to *C. b. bonapartei* (Palacios et al., 2019; Palacios et al.  
360 unpublished). We found that complete mitogenomes of *C. b. bonapartei* and *C. h. helianthea* are  
361 undifferentiated even though both subspecies differ strikingly in phenotype and are also  
362 distinguishable using nuclear markers. Incomplete lineage sorting may explain this result because  
363 the southern mitogenome group exhibited high nucleotide diversity in comparison with *C. b.*  
364 *consita* and *C. h. tamai*, a pattern one would not expect due to a recent introgression (Krosby and  
365 Rohwer, 2009). However, nuclear sorting without mitochondrial sorting would be unlikely  
366 because the effective population size of the latter is  $\frac{1}{4}$  that of the former. Instead, then, a scenario  
367 in which one mitogenome quickly swept through replacing the mitogenome of the other lineage  
368 and later recovered of nucleotide diversity may explain patterns of mitogenome sharing between  
369 *C. b. bonapartei* and *C. h. helianthea*.

370 The similarity in mitogenomes of *C. b. consita* and *C. h. tamai* appears more consistent with  
371 introgression after phenotypic differentiation in isolation. Mitochondrial introgression may often  
372 reflect selection (e.g. adaptive introgression via metabolic efficiency, Ballard and Melvin, 2010;  
373 Toews et al., 2014), but may also be due to demographic effects or to asymmetries between sexes  
374 in dispersal, mating behavior, and offspring production (Harris et al., 2018; James et al., 2016;  
375 Morales et al., 2017; Rheindt et al., 2014; Toews and Brelsford, 2012). We did not find  
376 functional changes in protein-coding genes between the northern and the southern mitogenomes  
377 suggesting adaptation, although adaptive changes related to substitutions in the control region (or  
378 in the 16SrRNA gen in the case of *C. h. tamai*) are possible. We are unaware of differential  
379 dispersal between sexes in *Coeligena*, in which dispersal and breeding biology are poorly known.  
380 Mitochondrial introgression between *C. b. consita* and *C. h. tamai* may have been facilitated by  
381 their geographical proximity and may have happened during a period of greater connectivity of  
382 forests in the Pleistocene (Flantua et al., 2019; Graham et al., 2010). Then, both lineages became  
383 isolated again and their mitogenomes diverged. The northern mitogenome may thus have evolved  
384 within *C. b. consita* and introgressed into *C. h. tamai* in a north to south direction, and such  
385 introgression may have further proceeded into *C. b. bonapartei* explaining why individuals ID 12  
386 and 15 have haplotypes more closely related to the northern group.

387 The divergent mitogenomes of four individuals of *C. b. bonapartei* (ID 10, 12, 14, and 15) were  
388 unexpected considering the similarity among all other sequences. Although individuals ID 12 and  
389 15 were closely related to the northern group, they shared 9 unique variants. Individuals ID10 and  
390 ID14 shared a mitogenome haplotype which was even more divergent (34 unique variants)  
391 sharing variants with both the northern (9) and the southern (18) groups. We can reject  
392 hybridization with other unstudied taxa as an explanation for these atypical mitogenomes because  
393 *ND2* sequences placed these specimens within the clade formed by *C. bonapartei* and *C.*  
394 *helianthea* to the exclusion of *C. b. eos* (Palacios et al. 2019). These atypical sequences may  
395 instead be evidence of persistence of a relict or a “ghost” mitochondrial lineage in *C. b.*  
396 *bonapartei* (Grandcolas et al., 2014; Zhang et al., 2019), which may have arisen and remained in  
397 isolation in the western slope of the Cordillera Oriental in Boyacá (Iguaque Massif and  
398 surroundings), a region where atypical patterns in mtDNA variation have been reported in other  
399 groups (Avenidaño and Donegan, 2015; Chaves et al., 2011; Chaves and Smith, 2011; Chesser et  
400 al., 2020; Guarnizo et al., 2009). Another less likely explanation for these atypical sequences may

401 be heteroplasmy and mitochondrial recombination which have been recognized in vertebrates in  
402 some cases (Piganeau et al., 2004; Rokas et al., 2003; Sammler et al., 2011).

403 In sum, based on our results and earlier work (Palacios et al. 2019) we hypothesize that a  
404 plausible evolutionary scenario accounting for patterns of mtDNA and phenotypic variation in *C.*  
405 *bonapartei* and *C. helianthea* is as follows. Based on comparison with the outgroup and other  
406 related species (*C. b. eos*, *C. lutetiae*, *C. orina*), the most probably body plumage coloration of  
407 the ancestor of our study clade was green with golden/orange underparts. The first lineage to  
408 diverge was likely *C. b. consita*, which evolved in the Serranía de Perijá in isolation from the  
409 ancestor of the other three lineages, retaining features of the ancestral plumage coloration but  
410 diverging in mtDNA. A second divergence event involved sister clades formed by *C. b.*  
411 *bonapartei* and *C. helianthea* (i.e. the common ancestor of both subspecies), with the former  
412 retaining the ancestral plumage and the latter evolving darker body coloration, rose belly, and  
413 aquamarine rump. These two lineages diverged in phenotype while maintaining an  
414 undifferentiated mitogenome owing to incomplete lineage sorting or introgression, except for  
415 populations of *C. b. bonapartei* which became isolated in the western slope of the Cordillera  
416 Oriental and diverged in mitogenome. Third, *C. h. tamai* and *C. h. helianthea* became isolated  
417 and diverged slightly in phenotype. Finally, during a period of forest connectivity the  
418 mitogenome of *C. b. consita* introgressed into *C. h. tamai*, a process followed by subsequent  
419 isolation of these lineages resulting in some divergence in their mitogenomes. Although this is a  
420 convoluted historical scenario, it is amenable to testing using genomic data and demographic  
421 models (e.g. Aguillon et al., 2018; Benham and Cheviron, 2019; Kearns et al., 2018) and other  
422 explanations for patterns of variation would appear even more complex.

## 423 **5. Conclusion**

424 Low genetic divergence among lineages of *C. bonapartei* and *C. helianthea* is a general pattern  
425 across their mitochondrial genomes despite their marked phenotypic differences. Mitogenomic  
426 variation in these lineages seems to more closely reflect geography and demographic history  
427 than the processes shaping their phenotypes and likely their nuclear genomes. Studying closely  
428 related lineages that diverged recently in complex topographic scenarios, such as the system of *C.*  
429 *bonapartei* and *C. helianthea*, might help to explain the different effects that evolutionary  
430 mechanisms may have in shaping the divergence between and within genomes. Incomplete

431 lineage sorting, mitochondrial introgression, and demographic processes like population  
432 bottlenecks, phases of expansion and contraction, and the persistence of relict lineages have  
433 likely acted in this system resulting in marked discordance between phenotypes and mtDNA  
434 variation. A natural next step to understand the processes at work in this system is to place the  
435 results of the present study in the context of genome-wide patterns of genetic variation.

#### 436 **Acknowledgments**

437 We thank the Fundación para la Promoción del Banco de la República and the Lovette Lab at the  
438 Cornell Lab of Ornithology for financial support. For providing tissue samples we thank the  
439 Museo de Historia Natural de la Universidad de los Andes (ANDES) and the Instituto Alexander  
440 von Humboldt (IAvH). We exported tissues samples to the Cornell Lab of Ornithology (Ithaca,  
441 NY) thanks to CITES permit No. CO 41452 granted by the Ministerio de Ambiente y Desarrollo  
442 Sostenible of Colombia. We also thank Irby J. Lovette and Bronwyn G. Butcher for facilitating  
443 laboratory work. The manuscript was improved thanks to comments by XXXX. CP dedicates this  
444 paper to Tim Minchin.

#### 445 **Research Data**

#### 446 **Conflict of interest.**

447 All the authors confirm we do not have any conflicts of interest to declare.

#### 448 **References**

449 Aguillon, S.M., Campagna, L., Harrison, R.G., Lovette, I.J., 2018. A flicker of hope: Genomic  
450 data distinguish Northern Flicker taxa despite low levels of divergence. *Auk* 135, 748–766.

451 <https://doi.org/10.1642/AUK-18-7.1>

452 Arcones, A., Ponti, R., Vieites, D.R., 2019. Mitochondrial substitution rates estimation for  
453 molecular clock analyses in modern birds based on full mitochondrial genomes. *bioRxiv*

454 855833. <https://doi.org/10.1101/855833>

455 Avendaño, J.E., Donegan, T.M., 2015. A distinctive new subspecies of *Scytalopus griseicollis*  
456 (*Aves*, Passeriformes, Rhinocryptidae) from the northern Eastern Cordillera of Colombia and

457 Venezuela. *Zookeys* 506, 137–153. <https://doi.org/10.3897/zookeys.506.9553>



- 458 Avise, J.C., Arnold, J., Ball, R.M., Bermingham, E., Lamb, T., Neigel, J.E., Reeb, C.A.,  
459 Saunders, N.C., 1987. Intraspecific phylogeography: The mitochondrial DNA bridge  
460 between population genetics and systematics. *Annu. Rev. Ecol. Syst.* 18, 489–522.  
461 <https://doi.org/10.1146/annurev.es.18.110187.002421>
- 462 Ballard, J.W.O., Melvin, R.G., 2010. Linking the mitochondrial genotype to the organismal  
463 phenotype: Invited review. *Mol. Ecol.* 19, 1523–1539. <https://doi.org/10.1111/j.1365-294X.2010.04594.x>
- 465 Ballard, J.W.O., Whitlock, M.C., 2004. The incomplete natural history of mitochondria. *Mol. Ecol.* 13, 729–744. <https://doi.org/10.1046/j.1365-294X.2003.02063.x>
- 467 Bandelt, H.-J., Forster, P., Röhl, A., 1999. Median-joining networks for inferring intraspecific  
468 phylogenies. *Mol. Biol. Evol.* 16, 37–48.
- 469 Benham, P.M., Cheviron, Z.A., 2019. Divergent mitochondrial lineages arose within a large,  
470 panmictic population of the Savannah sparrow (*Passerculus sandwichensis*). *Mol. Ecol.* 28,  
471 1765–1783. <https://doi.org/10.1111/mec.15049>
- 472 Benham, P.M., Cuervo, A.M., McGuire, J.A., Witt, C.C., 2015. Biogeography of the Andean  
473 metaltail hummingbirds: Contrasting evolutionary histories of tree line and habitat-  
474 generalist clades. *J. Biogeogr.* 42, 763–777. <https://doi.org/10.1111/jbi.12452>
- 475 Benham, P.M., Witt, C.C., 2016. The dual role of Andean topography in primary divergence:  
476 Functional and neutral variation among populations of the hummingbird, *Metallura*  
477 *tyrianthina*. *BMC Evol. Biol.* 16, 1–16. <https://doi.org/10.1186/s12862-016-0595-2>
- 478 Bonnet, T., Leblois, R., Rousset, F., Crochet, P.A., 2017. A reassessment of explanations for  
479 discordant introgressions of mitochondrial and nuclear genomes. *Evolution (N. Y.)* 71,  
480 2140–2158. <https://doi.org/10.1111/evo.13296>
- 481 Cadena, C.D., Pérez-Emán, J.L., Cuervo, A.M., Céspedes, L.N., Epperly, K.L., Klicka, J.T.,  
482 2019. Extreme genetic structure and dynamic range evolution in a montane passerine bird:  
483 implications for tropical diversification. *Biol. J. Linn. Soc.* 126, 487–506.  
484 <https://doi.org/10.1093/biolinnean/bly207>
- 485 Cadena, C.D., Zapata, F., Jiménez, I., 2018. Issues and perspectives in species delimitation using

- 486 phenotypic data: Atlantean evolution in Darwin's finches. *Syst. Biol.* 67, 181–194.  
487 <https://doi.org/10.1093/sysbio/syx071>
- 488 Campagna, L., Benites, P., Lougheed, S.C., Lijtmaer, D.A., Di Giacomo, A.S., Eaton, M.D.,  
489 Tubaro, P.L., 2012. Rapid phenotypic evolution during incipient speciation in a continental  
490 avian radiation. *Proc. R. Soc. B Biol. Sci.* 279, 1847–1856.  
491 <https://doi.org/10.1098/rspb.2011.2170>
- 492 Chaves, J.A., Pollinger, J.P., Smith, T.B., LeBuhn, G., 2007. The role of geography and ecology  
493 in shaping the phylogeography of the speckled hummingbird (*Adelomyia melanogenys*) in  
494 Ecuador. *Mol. Phylogenet. Evol.* 43, 795–807.  
495 <https://doi.org/http://dx.doi.org/10.1016/j.ympev.2006.11.006>
- 496 Chaves, J.A., Smith, T.B., 2011. Evolutionary patterns of diversification in the Andean  
497 hummingbird genus *Adelomyia*. *Mol. Phylogenet. Evol.* 60, 207–218.  
498 <https://doi.org/10.1016/j.ympev.2011.04.007>
- 499 Chaves, J.A., Weir, J.T., Smith, T.B., 2011. Diversification in *Adelomyia* hummingbirds follows  
500 Andean uplift. *Mol. Ecol.* 20, 4564–4576. [https://doi.org/10.1111/j.1365-](https://doi.org/10.1111/j.1365-294X.2011.05304.x)  
501 [294X.2011.05304.x](https://doi.org/10.1111/j.1365-294X.2011.05304.x)
- 502 Chesser, R.T., Isler, M.L., Cuervo, A.M., Cadena, C.D., Galen, S.C., Lane, D.F., Hosner, P.A.,  
503 2020. Conservative plumage masks extraordinary phylogenetic diversity in the *Grallaria*  
504 *rufula* (*Rufous Antpitta*) complex of the humid Andes. *Auk* In press.
- 505 D'Horta, F.M., Cuervo, A.M., Ribas, C.C., Brumfield, R.T., Miyaki, C.Y., 2013. Phylogeny and  
506 comparative phylogeography of *Sclerurus* (Aves: Furnariidae) reveal constant and cryptic  
507 diversification in an old radiation of rain forest understorey specialists. *J. Biogeogr.* 40, 37–  
508 49. <https://doi.org/10.1111/j.1365-2699.2012.02760.x>
- 509 Edwards, S. V., Kingan, S.B., Calkins, J.D., Balakrishnan, C.N., Jennings, W.B., Swanson, W.J.,  
510 Sorenson, M.D., 2005. Speciation in birds: Genes, geography, and sexual selection. *Proc.*  
511 *Natl. Acad. Sci.* 102, 6550–6557. <https://doi.org/10.1073/pnas.0501846102>
- 512 Eliason, C.M., Maia, R., Parra, J.L., Shawkey, M.D., 2020. Signal evolution and morphological  
513 complexity in hummingbirds (Aves: *Trochilidae*). *Evolution* (N. Y). 1–12.

- 514 <https://doi.org/10.1111/evo.13893>
- 515 Eo, S.H., DeWoody, J.A., 2010. Evolutionary rates of mitochondrial genomes correspond to  
516 diversification rates and to contemporary species richness in birds and reptiles. *Proc. R. Soc.*  
517 *B Biol. Sci.* 277, 3587–3592. <https://doi.org/10.1098/rspb.2010.0965>
- 518 Flantua, S.G.A., O’Dea, A., Onstein, R.E., Giraldo, C., Hooghiemstra, H., 2019. The flickering  
519 connectivity system of the north Andean páramos. *J. Biogeogr.* 1808–1825.  
520 <https://doi.org/10.1111/jbi.13607>
- 521 Galtier, N., Nabholz, B., GlÉmin, S., Hurst, G.D.D., 2009. Mitochondrial DNA as a marker of  
522 molecular diversity: A reappraisal. *Mol. Ecol.* 18, 4541–4550.  
523 <https://doi.org/10.1111/j.1365-294X.2009.04380.x>
- 524 García-Moreno, J., 2004. Is there a universal mtDNA clock for birds? *J. Avian Biol.* 35, 465–  
525 468. <https://doi.org/10.1111/j.0908-8857.2004.03316.x>
- 526 García-Moreno, J., Arctander, P., Fjeldså, J., 1999. Strong diversification at the treeline among  
527 *Metallura* hummingbirds. *Auk* 116, 702–711.
- 528 Gonzalez, C., Ornelas, J.F., Gutierrez-Rodriguez, C., 2011. Selection and geographic isolation  
529 influence hummingbird speciation: genetic, acoustic and morphological divergence in the  
530 wedge-tailed sabrewing (*Campylopterus curvipennis*). *BMC Evol. Biol.* 11, 38.
- 531 Goudet, J., Jombart, T., 2015. hierfstat: Estimation and tests of hierarchical F-statistics.
- 532 Graham, C.H., Silva, N., Velásquez-Tibatá, J., 2010. Evaluating the potential causes of range  
533 limits of birds of the Colombian Andes. *J. Biogeogr.* 37, 1863–1875.  
534 <https://doi.org/10.1111/j.1365-2699.2010.02356.x>
- 535 Grandcolas, P., Nattier, R., Trewick, S., 2014. Relict species: A relict concept? *Trends Ecol.*  
536 *Evol.* 29, 655–663. <https://doi.org/10.1016/j.tree.2014.10.002>
- 537 Guarnizo, C.E., Amézquita, A., Bermingham, E., 2009. The relative roles of vicariance versus  
538 elevational gradients in the genetic differentiation of the high Andean tree frog,  
539 *Dendropsophus labialis*. *Mol. Phylogenet. Evol.* 50, 84–92.  
540 <https://doi.org/10.1016/j.ympev.2008.10.005>

- 541 Gutiérrez-Pinto, N., Cuervo, A.M., Miranda, J., Pérez-Emán, J.L., Brumfield, R.T., Cadena,  
542 C.D., 2012. Non-monophyly and deep genetic differentiation across low-elevation barriers  
543 in a Neotropical montane bird (*Basileuterus tristriatus*; Aves: Parulidae). *Mol. Phylogenet.*  
544 *Evol.* 64, 156–65. <https://doi.org/10.1016/j.ympev.2012.03.011>
- 545 Hahn, C., Bachmann, L., Chevreux, B., 2013. Reconstructing mitochondrial genomes directly  
546 from genomic next-generation sequencing reads - A baiting and iterative mapping approach.  
547 *Nucleic Acids Res.* 41. <https://doi.org/10.1093/nar/gkt371>
- 548 Harris, R.B., Alström, P., Ödeen, A., Leaché, A.D., 2018. Discordance between genomic  
549 divergence and phenotypic variation in a rapidly evolving avian genus (*Motacilla*). *Mol.*  
550 *Phylogenet. Evol.* 120, 183–195. <https://doi.org/10.1016/j.ympev.2017.11.020>
- 551 Irwin, D.E., Rubtsov, A.S., Panov, E.N., 2009. Mitochondrial introgression and replacement  
552 between yellowhammers (*Emberiza citrinella*) and pine buntings (*Emberiza leucocephalos*)  
553 (Aves: Passeriformes). *Biol. J. Linn. Soc.* 98, 422–438. [https://doi.org/10.1111/j.1095-](https://doi.org/10.1111/j.1095-8312.2009.01282.x)  
554 [8312.2009.01282.x](https://doi.org/10.1111/j.1095-8312.2009.01282.x)
- 555 James, J., Castellano, D., Eyre-Walker, A., 2017. DNA sequence diversity and the efficiency of  
556 natural selection in animal mitochondrial DNA. *Heredity (Edinb.)* 118, 88–95.  
557 <https://doi.org/10.1038/hdy.2016.108>
- 558 James, J.E., Piganeau, G., Eyre-Walker, A., 2016. The rate of adaptive evolution in animal  
559 mitochondria. *Mol. Ecol.* 25, 67–78. <https://doi.org/10.1111/mec.13475>
- 560 Jiménez, R.A., Ornelas, J.F., 2016. Historical and current introgression in a Mesoamerican  
561 hummingbird species complex: A biogeographic perspective. *PeerJ* 2016.  
562 <https://doi.org/10.7717/peerj.1556>
- 563 Kearns, A.M., Restani, M., Szabo, I., Schrøder-nielsen, A., Kim, J.A., Richardson, H.M.,  
564 Marzluff, J.M., Fleischer, R.C., Johnsen, A., Omland, K.E., 2018. Genomic evidence of  
565 speciation reversal in ravens. *Nat. Commun.* 9. <https://doi.org/10.1038/s41467-018-03294-w>
- 566 Kraus, R.H.S., Wink, M., 2015. Avian genomics: Fledging into the wild! *J. Ornithol.* 156, 851–  
567 865. <https://doi.org/10.1007/s10336-015-1253-y>
- 568 Krosby, M., Rohwer, S., 2009. A 2000 km genetic wake yields evidence for northern glacial

- 569 refugia and hybrid zone movement in a pair of songbirds. *Proc. R. Soc. B Biol. Sci.* 276,  
570 615–621. <https://doi.org/10.1098/rspb.2008.1310>
- 571 Leigh, J.W., Bryant, D., 2015. POPART: Full-feature software for haplotype network  
572 construction. *Methods Ecol. Evol.* 6, 1110–1116. <https://doi.org/10.1111/2041-210X.12410>
- 573 Lougheed, S.C., Campagna, L., Dávila, J.A., Tubaro, P.L., Lijtmaer, D.A., Handford, P., 2013.  
574 Continental phylogeography of an ecologically and morphologically diverse Neotropical  
575 songbird, *Zonotrichia capensis*. *BMC Evol. Biol.* 13. [https://doi.org/10.1186/1471-2148-13-](https://doi.org/10.1186/1471-2148-13-58)  
576 58
- 577 Lovette, I.J., 2004. Mitochondrial Dating and Mixed Support for the “2% Rule” in Birds. *Auk*  
578 121, 1–6. <https://doi.org/10.2307/4090049>
- 579 Lovette, I.J., Pérez-Emán, J.L., Sullivan, J.P., Banks, R.C., Fiorentino, I., Córdoba-Córdoba, S.,  
580 Echeverry-Galvis, M., Barker, F.K., Burns, K.J., Klicka, J., Lanyon, S.M., Bermingham, E.,  
581 2010. A comprehensive multilocus phylogeny for the wood-warblers and a revised  
582 classification of the Parulidae (Aves). *Mol. Phylogenet. Evol.* 57, 753–770.  
583 <https://doi.org/10.1016/j.ympev.2010.07.018>
- 584 Lozano-Jaramillo, M., Rico-Guevara, A., Cadena, C.D., 2014. Genetic differentiation, niche  
585 divergence, and the origin and maintenance of the disjunct distribution in the blossomcrown  
586 *Anthocephala floriceps* (Trochilidae). *PLoS One* 9.  
587 <https://doi.org/10.1371/journal.pone.0108345>
- 588 Luna, L.W., Rêgo, P.S. do, Sampaio, I., Schneider, H., Carneiro, L.S., Araripe, J., de Girão e  
589 Silva, W.A., Souza, T.O., 2017. Molecular data and distribution dynamics indicate a recent  
590 and incomplete separation of manakins species of the genus *Antilophia* (Aves: Pipridae) in  
591 response to Holocene climate change . *J. Avian Biol.* 48, 1177–1188.  
592 <https://doi.org/10.1111/jav.01378>
- 593 McGuire, J.A., Witt, C.C., Remsen, J. V., Dudley, R., Altshuler, D.L., 2008. A higher-level  
594 taxonomy for hummingbirds. *J. Ornithol.* 150, 155–165. [https://doi.org/10.1007/s10336-](https://doi.org/10.1007/s10336-008-0330-x)  
595 008-0330-x
- 596 Moore, W.S., 1995. Inferring phylogenies from mtDNA variation: Mitochondrial-gene trees

- 597 versus nuclear-gene trees. *Evolution* (N. Y). 49, 718. <https://doi.org/10.2307/2411136>
- 598 Morales, H.E., Pavlova, A., Joseph, L., Sunnucks, P., 2015. Positive and purifying selection in  
599 mitochondrial genomes of a bird with mitonuclear discordance. *Mol. Ecol.* 24, 2820–2837.  
600 <https://doi.org/10.1111/mec.13203>
- 601 Morales, H.E., Sunnucks, P., Joseph, L., Pavlova, A., 2017. Perpendicular axes of differentiation  
602 generated by mitochondrial introgression. *Mol. Ecol.* 26, 3241–3255.  
603 <https://doi.org/10.1111/mec.14114>
- 604 Morgan-Richards, M., Trewick, S.A., Bartosch-Härlid, A., Kardailsky, O., Phillips, M.J.,  
605 McLenachan, P.A., Penny, D., 2008. Bird evolution: Testing the Metaves clade with six new  
606 mitochondrial genomes. *BMC Evol. Biol.* 8, 1–12. <https://doi.org/10.1186/1471-2148-8-20>
- 607 Ornelas, J.F., González, C., de los Monteros, A.E., Rodríguez-Gómez, F., García-Feria, L.M.,  
608 2014. In and out of Mesoamerica: temporal divergence of *Amazilia* hummingbirds pre-dates  
609 the orthodox account of the completion of the Isthmus of Panama. *J. Biogeogr.* 41, 168–181.  
610 <https://doi.org/10.1111/jbi.12184>
- 611 Ornelas, J.F., González, C., Hernández-Baños, B.E., García-Moreno, J., 2016. Molecular and  
612 iridescent feather reflectance data reveal recent genetic diversification and phenotypic  
613 differentiation in a cloud forest hummingbird. *Ecol. Evol.* 6, 1104–1127.  
614 <https://doi.org/10.1002/ece3.1950>
- 615 Oyler-McCance, S.J., Oh, K.P., Langin, K.M., Aldridge, C.L., 2016. A field ornithologist’s guide  
616 to genomics: Practical considerations for ecology and conservation. *Auk* 133, 626–648.  
617 <https://doi.org/10.1642/AUK-16-49.1>
- 618 Palacios, C., Garcia-R, S., Parra, J.L., Cuervo, A.M., Stiles, F.G., McCormack, J.E., Cadena,  
619 C.D., 2019. Shallow evolutionary divergence between two Andean hummingbirds:  
620 Speciation with gene flow? *Auk* 136, 4. <https://doi.org/10.1101/249755>
- 621 Parra, J.L., 2010. Color evolution in the hummingbird genus *Coeligena*. *Evolution* (N. Y). 64,  
622 324–335. <https://doi.org/10.1111/j.1558-5646.2009.00827.x>
- 623 Parra, J.L., Remsen, J. V., Alvarez-Rebolledo, M., McGuire, J.A., 2009. Molecular phylogenetics  
624 of the hummingbird genus *Coeligena*. *Mol. Phylogenet. Evol.* 53, 425–434.

- 625 <https://doi.org/10.1016/j.ympev.2009.07.006>
- 626 Piganeau, G., Gardner, M., Eyre-Walker, A., 2004. A broad survey of recombination in animal  
627 mitochondria. *Mol. Biol. Evol.* 21, 2319–2325. <https://doi.org/10.1093/molbev/msh244>
- 628 Pons, J.M., Sonsthagen, S., Dove, C., Crochet, P.A., 2014. Extensive mitochondrial introgression  
629 in North American Great Black-backed Gulls (*Larus marinus*) from the American Herring  
630 Gull (*Larus smithsonianus*) with little nuclear DNA impact. *Heredity* (Edinb). 112, 226–  
631 239. <https://doi.org/10.1038/hdy.2013.98>
- 632 Price, T.D., 2008. *Speciation in Birds*. Roberts & Company Publishers, Greenwood Village,  
633 Colorado.
- 634 Prosdocimi, F., Souto, H.M., Ruschi, P.A., Furtado, C., Jennings, W.B., 2016. Complete  
635 mitochondrial genome of the versicoloured emerald hummingbird *Amazilia versicolor*, a  
636 polymorphic species. *Mitochondrial DNA* 27, 3214–3215.  
637 <https://doi.org/10.3109/19401736.2015.1007352>
- 638 R Core Team, 2017. *R: A language and environment for statistical computing*.
- 639 Remsen, J. V., 2005. Pattern, process, and rigor meet classification. *Auk* 122, 403.  
640 [https://doi.org/10.1642/0004-8038\(2005\)122\[0403:pparmc\]2.0.co;2](https://doi.org/10.1642/0004-8038(2005)122[0403:pparmc]2.0.co;2)
- 641 Rheindt, F.E., Fujita, M.K., Wilton, P.R., Edwards, S. V., 2014. Introgression and phenotypic  
642 assimilation in *Zimmerius* flycatchers (Tyrannidae): Population genetic and phylogenetic  
643 inferences from genome-wide SNPs. *Syst. Biol.* 63, 134–152.  
644 <https://doi.org/10.1093/sysbio/syt070>
- 645 Rheindt, F.E., Székely, T., Edwards, S. V, Lee, P.L.M., Burke, T., Kennerley, P.R., Bakewell,  
646 D.N., Alrashidi, M., Kosztolányi, A., Weston, M. a, Liu, W.-T., Lei, W.-P., Shigeta, Y.,  
647 Javed, S., Zefania, S., Küpper, C., 2011. Conflict between genetic and phenotypic  
648 differentiation: The evolutionary history of a “lost and rediscovered” shorebird. *PLoS One*  
649 6, e26995. <https://doi.org/10.1371/journal.pone.0026995>
- 650 Ribas, C.C., Aleixo, A., Nogueira, A.C.R., Miyaki, C.Y., Cracraft, J., 2012. A  
651 palaeobiogeographic model for biotic diversification within Amazonia over the past three  
652 million years. *Proc. R. Soc. B Biol. Sci.* 279, 681–689.

- 653 <https://doi.org/10.1098/rspb.2011.1120>
- 654 Rodríguez-Gómez, F., Ornelas, J.F., 2015. At the passing gate: Past introgression in the process  
655 of species formation between *Amazilia violiceps* and *A. Viridifrons* hummingbirds along the  
656 Mexican Transition Zone. *J. Biogeogr.* 42, 1305–1318. <https://doi.org/10.1111/jbi.12506>
- 657 Rokas, A., Ladoukakis, E., Zouros, E., 2003. Animal mitochondrial DNA recombination  
658 revisited. *Trends Ecol. Evol.* 18, 411–417. [https://doi.org/10.1016/S0169-5347\(03\)00125-3](https://doi.org/10.1016/S0169-5347(03)00125-3)
- 659 Roulin, A., 2004. The evolution, maintenance and adaptive function of genetic colour  
660 polymorphism in birds. *Biol. Rev. Camb. Philos. Soc.* 79, 815–48.
- 661 Rozas, J., Ferrer-Mata, A., Sanchez-DelBarrio, J.C., Guirao-Rico, S., Librado, P., Ramos-Onsins,  
662 S.E., Sanchez-Gracia, A., 2017. DnaSP 6: DNA sequence polymorphism analysis of large  
663 data sets. *Mol. Biol. Evol.* 34, 3299–3302. <https://doi.org/10.1093/molbev/msx248>
- 664 Sammler, S., Bleidorn, C., Tiedemann, R., 2011. Full mitochondrial genome sequences of two  
665 endemic Philippine hornbill species (Aves: Bucerotidae) provide evidence for pervasive  
666 mitochondrial DNA recombination. *BMC Genomics* 12. [https://doi.org/10.1186/1471-2164-](https://doi.org/10.1186/1471-2164-12-35)  
667 12-35
- 668 Sedano, R.E., Burns, K.J., 2010. Are the Northern Andes a species pump for Neotropical birds?  
669 Phylogenetics and biogeography of a clade of Neotropical tanagers (Aves: Thraupini). *J.*  
670 *Biogeogr.* 37, 325–343. <https://doi.org/10.1111/j.1365-2699.2009.02200.x>
- 671 Sornoza-Molina, F., Freile, J.F., Nilsson, J., Krabbe, N., Bonaccorso, E., 2018. A striking,  
672 critically endangered, new species of hillstar (Trochilidae: *Oreotrochilus*) from the  
673 southwestern Andes of Ecuador. *Auk* 135, 1146–1171. <https://doi.org/10.1642/auk-18-58.1>
- 674 Sosa, J., Parra, J.L., Stavenga, D.G., Giraldo, M.A., 2020. Sexual dichromatism of the Blue-  
675 throated Starfrontlet, *Coeligena helianthea*, hummingbird plumage. *J. Ornithol.* 161, 289–  
676 296. <https://doi.org/10.1007/s10336-019-01709-z>
- 677 Souto, H.M., Ruschi, P.A., Furtado, C., Jennings, W.B., Prosdocimi, F., 2016. The complete  
678 mitochondrial genome of the ruby-topaz hummingbird *Chrysolampis mosquitus* through  
679 Illumina sequencing. *Mitochondrial DNA* 27, 769–770.  
680 <https://doi.org/10.3109/19401736.2014.915533>



- 681 Stamatakis, A., 2014. RAxML version 8: A tool for phylogenetic analysis and post-analysis of  
682 large phylogenies. *Bioinformatics* 30, 1312–1313.  
683 <https://doi.org/10.1093/bioinformatics/btu033>
- 684 Toews, D.P.L., Brelsford, A., 2012. The biogeography of mitochondrial and nuclear discordance  
685 in animals. *Mol. Ecol.* 21, 3907–3930. <https://doi.org/10.1111/j.1365-294X.2012.05664.x>
- 686 Toews, D.P.L., Campagna, L., Taylor, S.A., Balakrishnan, C.N., Baldassarre, D.T., Deane-Coe,  
687 P.E., Harvey, M.G., Hooper, D.M., Irwin, D.E., Judy, C.D., Mason, N.A., McCormack, J.E.,  
688 McCracken, K.G., Oliveros, C.H., Safran, R.J., Scordato, E.S.C., Stryjewski, K.F., Tigano,  
689 A., Uy, J.A.C., Winger, B.M., 2016. Genomic approaches to understanding population  
690 divergence and speciation in birds. *Auk* 133, 13–30. <https://doi.org/10.1642/AUK-15-51.1>
- 691 Toews, D.P.L., Mandic, M., Richards, J.G., Irwin, D.E., 2014. Migration, mitochondria, and the  
692 yellow-rumped warbler. *Evolution* (N. Y). 68, 241–255. <https://doi.org/10.1111/evo.12260>
- 693 Uy, J.A.C., Moyle, R.G., Filardi, C.E., 2009. Plumage and song differences mediate species  
694 recognition between incipient flycatcher species of the Solomon Islands. *Evolution* (N. Y).  
695 63, 153–164. <https://doi.org/10.1111/j.1558-5646.2008.00530.x>
- 696 Valderrama, E., Pérez-Emán, J.L., Brumfield, R.T., Cuervo, A.M., Cadena, C.D., 2014. The  
697 influence of the complex topography and dynamic history of the montane Neotropics on the  
698 evolutionary differentiation of a cloud forest bird (*Premnoplex brunnescens*, Furnariidae). *J.*  
699 *Biogeogr.* 41, 1533–1546. <https://doi.org/10.1111/jbi.12317>
- 700 Wilson, A.C., Kathleen, M., Higuchi, R.G., Stephen, R., Prager, E.M., 1985. Mitochondrial DNA  
701 and two perspectives on evolutionary genetics. *Biol. J. Linn. Soc.* 26, 375–400.
- 702 Winger, B.M., Bates, J.M., 2015. The tempo of trait divergence in geographic isolation: Avian  
703 speciation across the Marañón Valley of Peru. *Evolution* (N. Y). 69, 772–787.  
704 <https://doi.org/10.1111/evo.12607>
- 705 Wort, E.J.G., Fenberg, P.B., Williams, S.T., 2017. Testing the contribution of individual genes in  
706 mitochondrial genomes for assessing phylogenetic relationships in Vetigastropoda. *J.*  
707 *Molluscan Stud.* 83, 123–128. <https://doi.org/10.1093/mollus/eyw044>
- 708 Zamudio-Beltrán, L.E., Hernández-Baños, B.E., 2018. Genetic and morphometric divergence in

709 the Garnet-Throated Hummingbird *Lamprolaima rhami* (Aves: Trochilidae). PeerJ 2018, 1–  
710 22. <https://doi.org/10.7717/peerj.5733>

711 Zamudio-Beltrán, L.E., Hernández-Baños, B.E., 2015. A multilocus analysis provides evidence  
712 for more than one species within *Eugenes fulgens* (Aves: Trochilidae). Mol. Phylogenet.  
713 Evol. 90, 80–84. <https://doi.org/10.1016/j.ympev.2015.04.024>

714 Zhang, D., Tang, L., Cheng, Y., Hao, Y., Xiong, Y., Song, G., Qu, Y., Rheindt, F.E., Alstro, P.,  
715 Jia, C., Lei, F., 2019. “ Ghost Introgression ” As a Cause of Deep Mitochondrial Divergence  
716 in a Bird Species Complex. Mol. Biol. Evol. 36, 2375–2386.  
717 <https://doi.org/10.1093/molbev/msz170>

718

719

720 **Figure Captions**

721 **Figure 1.** The maximum-likelihood phylogeny (B) and haplotype network (C) support two main  
722 mitogenome groups in *C. bonapartei* and *C. helianthea* more related to their geographical  
723 distribution (A) than with their taxonomic or phenotypic assignation. Note that the mitogenomes  
724 of *C. b. consita* and *C. h. tamai* are differentiated whereas the mitogenomes of *C. b. bonapartei*  
725 and *C. h. helianthea* are indistinguishable. Numbers on the tips of the tree, on the haplotype  
726 network and on locations in the map correspond to individual IDs in Table S1. Colors correspond  
727 to the assigned subspecies *C. b. consita* (orange), *C. b. bonapartei* (yellow), *C. h. helianthea*  
728 (light blue), and *C. h. tamai* (dark blue). In the map the teal area is the region where nominate  
729 subspecies are sympatric. In the tree, numbers on branches are ML-bootstrap values; branch  
730 lengths were set to equal.

731 **Figure 2.** The mitochondrial genome structure of *Coeligena* hummingbirds follows the typical  
732 organization of birds: 22 tRNAs (pink), 2 rRNAs (raspberry), 13 protein-coding genes PCGs  
733 (blue), and the control region (gray). Coding sequences CDS are in yellow. Substitutions among  
734 the three genetic groups *C. b. consita* (orange), *C. b. tamai* (blue) and the southern group (green)  
735 are represented in the inner circles (singletons and intrapopulation variant sites are not  
736 represented). Gray boxes indicate the three non-synonymous substitutions found, the box with  
737 black edges indicates the only one involving a change between amino-acids with different  
738 functional features.

739 **Table Captions**

740 **Table 1. Population genetic statistics and measures of genetic divergence between *C.***  
741 ***bonapartei* and *C. helianthea* and among groups within.** Nucleotide diversity  $\Pi$  is lower in *C.*  
742 *b. consita* and *C. h. tamai* than in nominate subspecies. Absolute genetic divergence  $D_{xy}$  is low  
743 yet relative divergence  $F_{st}$  is high across comparisons. Genetic groups are derived from the  
744 clustering patterns analyses and are marked as “Gen” in the table.

745

746 **Figures**

747 **Figure 1.**

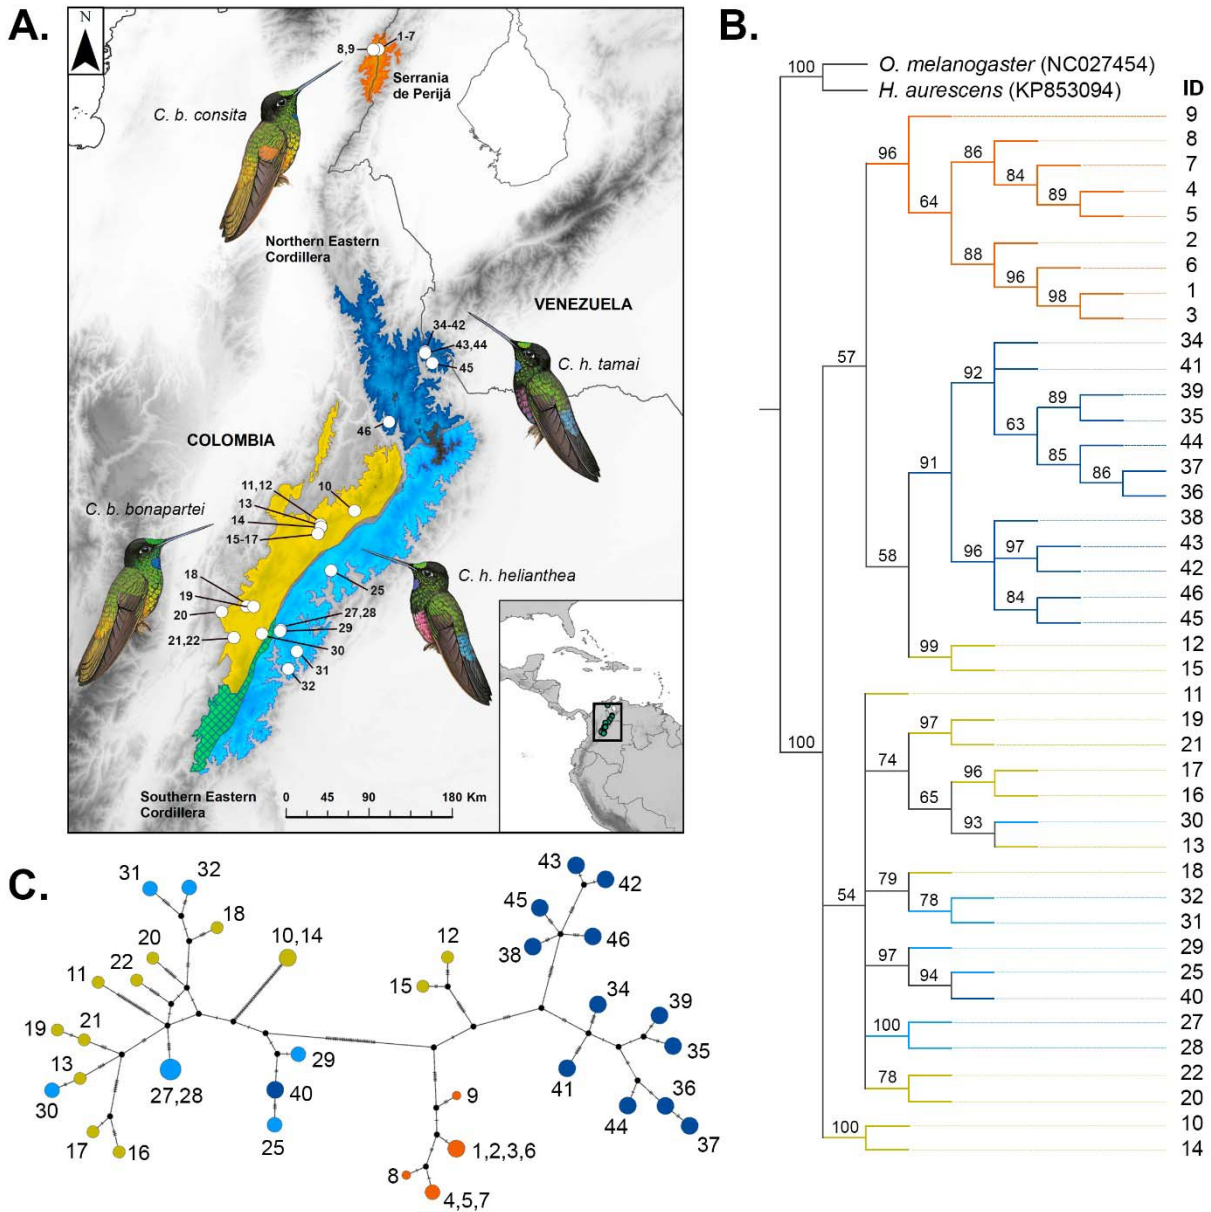

748

749 **Figure 2.**

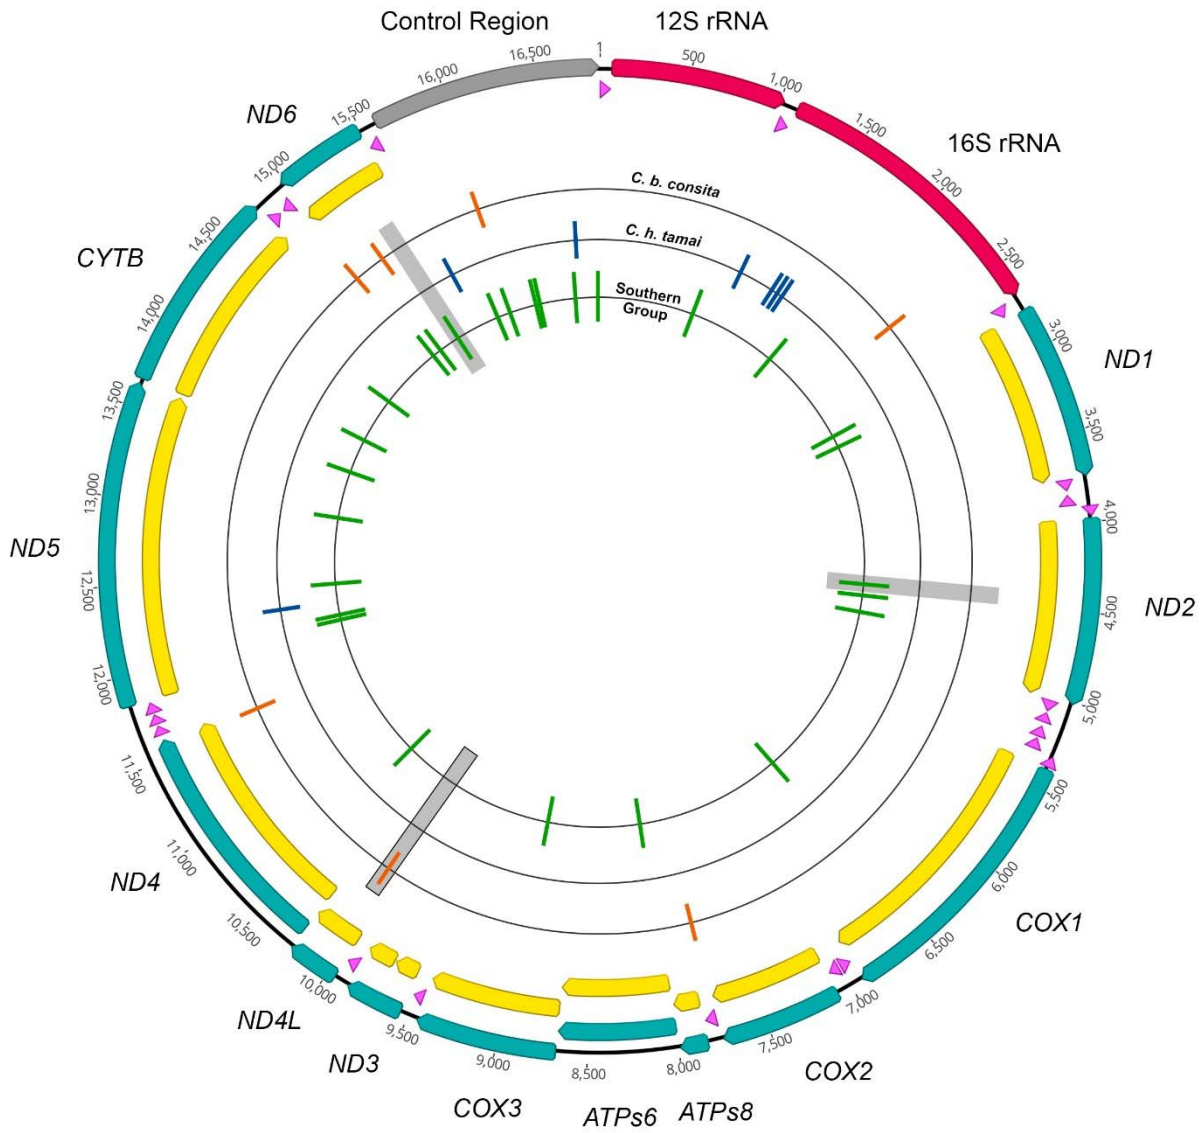

750

751 **Tables**

752 **Table 1.**

**Population genetic statistics**

| Population               | # of Seq | # of Variants | Pi      | Tajima's D | T's D p-value |
|--------------------------|----------|---------------|---------|------------|---------------|
| <i>C. bonapartei</i>     | 22       | 171           | 0.00249 | -0.44      | 0.351         |
| <i>C. helianthea</i>     | 20       | 133           | 0.00218 | -0.09      | 0.481         |
| <i>C. b. consita</i>     | 9        | 9             | 0.00019 | -0.05      | 0.500         |
| <i>C. b. bonapartei</i>  | 13       | 156           | 0.00254 | -0.68      | 0.273         |
| <i>C. h. helianthea</i>  | 7        | 40            | 0.00084 | -0.75      | 0.274         |
| <i>C. h. tamai</i>       | 13       | 98            | 0.00124 | -1.54      | 0.057         |
| <hr/>                    |          |               |         |            |               |
| <i>C. b. consita</i> Gen | 9        | 9             | 0.00019 | -0.05      | 0.500         |
| <i>C. h. tamai</i> Gen   | 12       | 54            | 0.00089 | -0.76      | 0.251         |
| Northern group Gen       | 23       | 92            | 0.00120 | -0.76      | 0.242         |
| Southern group Gen       | 17       | 100           | 0.00180 | -1.63      | 0.043         |

**Measures of genetic divergence**

| Population 1             | Population 2            | Fst   | Fst p-value | Dxy    |
|--------------------------|-------------------------|-------|-------------|--------|
| <i>C. bonapartei</i>     | <i>C. helianthea</i>    | 0.076 | 0.0160      | 0.0026 |
| <i>C. b. consita</i>     | <i>C. b. bonapartei</i> | 0.385 | 0.0010      | 0.0032 |
| <i>C. b. consita</i>     | <i>C. h. helianthea</i> | 0.764 | 0.0010      | 0.0032 |
| <i>C. b. consita</i>     | <i>C. h. tamai</i>      | 0.402 | 0.0010      | 0.0017 |
| <i>C. b. bonapartei</i>  | <i>C. h. helianthea</i> | 0.083 | 0.1069      | 0.0019 |
| <i>C. b. bonapartei</i>  | <i>C. h. tamai</i>      | 0.317 | 0.0010      | 0.0034 |
| <i>C. h. helianthea</i>  | <i>C. h. tamai</i>      | 0.518 | 0.0010      | 0.0033 |
| <hr/>                    |                         |       |             |        |
| Northern group Gen       | Southern group Gen      | 0.514 | 0.0010      | 0.0035 |
| <i>C. b. consita</i> Gen | <i>C. h. tamai</i> Gen  | 0.502 | 0.0010      | 0.0016 |

753

1 **Supplementary material**

2 **Figure S1. Maximun-likelihood phylogenies by alignment.** Numbers on the tips of the trees  
3 correspond to individuals IDs in Table S1. Numbers on branches are ML-bootstrap values;  
4 branch lengths were set to equal in the trees. Colors correspond to the assigned subspecies *C. b.*  
5 *consita* (orange), *C. b. bonapartei* (yellow), *C. h. helianthea* (light blue), and *C. h. tamai* (dark  
6 blue).

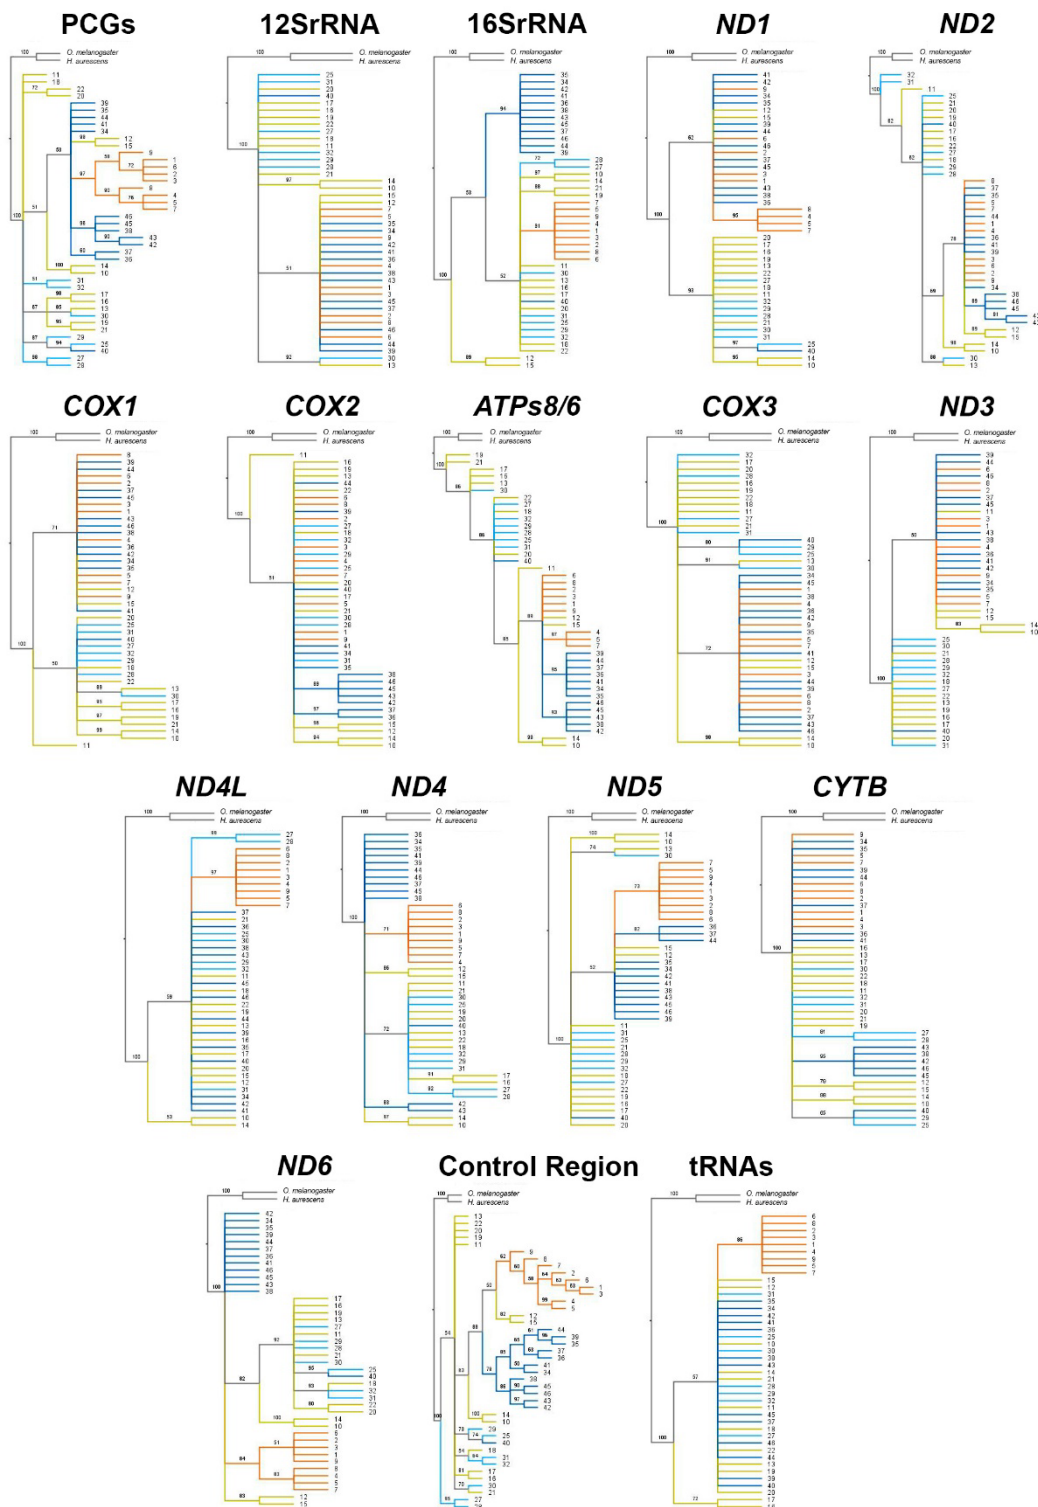



1 **Table S1. Specimen data and mitogenome assembly data.** Paper-ID (identification number) corresponds to the ID used through this  
 2 manuscript. Sample ID corresponds primarily to the tissue sample ID and secondarily to the specimen voucher or the collector's ID.  
 3 Specimen voucher column corresponds to the skin specimen ID in a collection or to the collector's ID. All samples are from Colombia.  
 4 Sex column F = female and M = male.

| Paper-ID | Sample ID       | Species              | Subspecies        | Sex | Specimen voucher | Latitude and Longitude | Length (bp) | N° of reads assembled | Average coverage | Maximum coverage |
|----------|-----------------|----------------------|-------------------|-----|------------------|------------------------|-------------|-----------------------|------------------|------------------|
| 1        | ANDES-T1287     | <i>C. bonapartei</i> | <i>consita</i>    | F   | ICNAves36833     | 10.3669 -72.8975       | 16828       | 5073                  | 59.09            | 162              |
| 2        | ANDES-T1288     | <i>C. bonapartei</i> | <i>consita</i>    | F   | ICNAves36820     | 10.3669 -72.8975       | 16839       | 4095                  | 54.43            | 115              |
| 3        | ANDES-T1289     | <i>C. bonapartei</i> | <i>consita</i>    | M   | ICNAves36819     | 10.3669 -72.8975       | 16824       | 8439                  | 106.4            | 254              |
| 4        | ANDES-T1290     | <i>C. bonapartei</i> | <i>consita</i>    | M   | ICNAves36841     | 10.3669 -72.8975       | 16820       | 9122                  | 121.24           | 261              |
| 5        | ANDES-T1291     | <i>C. bonapartei</i> | <i>consita</i>    | F   | ICNAves36818     | 10.3669 -72.8975       | 16820       | 6892                  | 88.44            | 198              |
| 6        | ANDES-T1292     | <i>C. bonapartei</i> | <i>consita</i>    | M   | ICNAves36822     | 10.3669 -72.8975       | 16832       | 15039                 | 181.89           | 416              |
| 7        | IAvH-CT8567     | <i>C. bonapartei</i> | <i>consita</i>    | F   | ICNAves37116     | 10.3669 -72.8975       | 16832       | 7908                  | 86.29            | 195              |
| 8        | IAvH-CT8473     | <i>C. bonapartei</i> | <i>consita</i>    | M   | ICNAves37115     | 10.3640 -72.9474       | 16848       | 11074                 | 108.6            | 2755             |
| 9        | IAvH-CT8503     | <i>C. bonapartei</i> | <i>consita</i>    | F   | ICNAves37104     | 10.3640 -72.9474       | 16828       | 1362                  | 19.21            | 46               |
| 10       | IAvH-CT00017312 | <i>C. bonapartei</i> | <i>bonapartei</i> | M   | IAvH15365        | 5.8643 -73.1305        | 16841       | 34465                 | 446.7            | 955              |
| 11       | IAvH-CT00004191 | <i>C. bonapartei</i> | <i>bonapartei</i> | M   | IAvH12581        | 5.7297 -73.4628        | 16821       | 10214                 | 120.64           | 293              |
| 12       | IAvH-CT4188     | <i>C. bonapartei</i> | <i>bonapartei</i> | M   | IAvH12578        | 5.7297 -73.4628        | 16830       | 27079                 | 361.44           | 822              |
| 13       | IAvH-CT6966     | <i>C. bonapartei</i> | <i>bonapartei</i> | F   | IAvH14196        | 5.7066 -73.4601        | 16829       | 5938                  | 51.1             | 175              |
| 14       | IAvH-CT6973     | <i>C. bonapartei</i> | <i>bonapartei</i> | M   | IAvH14203        | 5.7046 -73.4572        | 16825       | 9083                  | 112.62           | 291              |
| 15       | IAvH-CT00002277 | <i>C. bonapartei</i> | <i>bonapartei</i> | M   | IAvH12299        | 5.6394 -73.4872        | 16837       | 1288                  | 18.43            | 51               |
| 16       | IAvH-CT2265     | <i>C. bonapartei</i> | <i>bonapartei</i> | F   | IAvH12290        | 5.6394 -73.4872        | 16821       | 30242                 | 391.64           | 892              |
| 17       | IAvH-CT2271     | <i>C. bonapartei</i> | <i>bonapartei</i> | F   | IAvH12292        | 5.6394 -73.4872        | 16833       | 4281                  | 50.66            | 141              |
| 18       | ICN-Aves34450   | <i>C. bonapartei</i> | <i>bonapartei</i> | M   | ICNAves34450     | 4.9333 -74.1833        | 16857       | 2574                  | 30.93            | 249              |
| 19       | ANDES-T2006     | <i>C. bonapartei</i> | <i>bonapartei</i> | F   | JLPV74           | 4.9290 -74.1121        | 16856       | 157848                | 1555.78          | 33588            |
| 20       | DCP01           | <i>C. bonapartei</i> | <i>bonapartei</i> | F   | DCP01            | 4.8817 -74.4267        | 16834       | 7840                  | 85.53            | 373              |
| 21       | IAvH-CT00006791 | <i>C. bonapartei</i> | <i>bonapartei</i> | M   | IAvH13986        | 4.6271 -74.3076        | 16836       | 1898                  | 27.53            | 66               |
| 22       | IAvH-CT6802     | <i>C. bonapartei</i> | <i>bonapartei</i> | F   | IAvH13997        | 4.6271 -74.3076        | 16813       | 2825                  | 36.08            | 89               |
| 23       | Andes-BT 402    | <i>C. helianthea</i> | <i>helianthea</i> | M   | ICNAves36409     | 7.0724 -72.9380        | Na          | Na                    | Na               | Na               |
| 24       | IAvH-CT-11225   | <i>C. helianthea</i> | <i>helianthea</i> | F   | IAvH8398         | 7.3042 -72.3711        | Na          | Na                    | Na               | Na               |
| 25       | IAvH-CT18134    | <i>C. helianthea</i> | <i>helianthea</i> | M   | ICNAves38141     | 5.2819 -73.3608        | 16859       | 6707                  | 75.95            | 221              |
| 26       | IAvH-CT-2530    | <i>C. helianthea</i> | <i>helianthea</i> | F   | IAvH12633        | 4.4939 -73.6925        | Na          | Na                    | Na               | Na               |

|    |                 |                      |                   |   |              |                 |       |      |        |      |
|----|-----------------|----------------------|-------------------|---|--------------|-----------------|-------|------|--------|------|
| 27 | IAvH-CT00002569 | <i>C. helianthea</i> | <i>helianthea</i> | F | IAvH12682    | 4.7036 -73.8511 | 16814 | 3331 | 44.39  | 102  |
| 28 | IAvH-CT2599     | <i>C. helianthea</i> | <i>helianthea</i> | M | IAvH12719    | 4.7036 -73.8511 | 16825 | 7964 | 95.38  | 378  |
| 29 | IAvH-CT2601     | <i>C. helianthea</i> | <i>helianthea</i> | F | IAvH12722    | 4.6900 -73.8558 | 16843 | 680  | 11.84  | 27   |
| 30 | ANDES-T813      | <i>C. helianthea</i> | <i>helianthea</i> | ? | FGS4129      | 4.6667 -74.0330 | 16835 | 1600 | 21.06  | 206  |
| 31 | IAvH-CT00002504 | <i>C. helianthea</i> | <i>helianthea</i> | M | IAvH12590    | 4.4939 -73.6925 | 16817 | 1040 | 17.13  | 43   |
| 32 | ANDES-T70       | <i>C. helianthea</i> | <i>helianthea</i> | F | ICNAves36307 | 4.3213 -73.7768 | 16848 | 6806 | 76.78  | 223  |
| 33 | Andes-BT 1126   | <i>C. helianthea</i> | <i>tamai</i>      | M | IAvH 14908   | 7.4181 -72.4431 | Na    | Na   | Na     | Na   |
| 34 | ANDES-T1127     | <i>C. helianthea</i> | <i>tamai</i>      | F | IAvH14906    | 7.4181 -72.4431 | 16825 | 4194 | 51.46  | 121  |
| 35 | ANDES-T1128     | <i>C. helianthea</i> | <i>tamai</i>      | F | IAvH14899    | 7.4181 -72.4431 | 16821 | 8931 | 107.05 | 253  |
| 36 | ANDES-T1129     | <i>C. helianthea</i> | <i>tamai</i>      | F | IAvH14897    | 7.4181 -72.4431 | 16857 | 3031 | 38.57  | 164  |
| 37 | ANDES-T1130     | <i>C. helianthea</i> | <i>tamai</i>      | M | IAvH14885    | 7.4181 -72.4431 | 16845 | 3942 | 45.66  | 112  |
| 38 | ANDES-T1131     | <i>C. helianthea</i> | <i>tamai</i>      | F | IAvH14884    | 7.4181 -72.4431 | 16840 | 6934 | 85.74  | 1391 |
| 39 | ANDES-T916      | <i>C. helianthea</i> | <i>tamai</i>      | M | IAvH14818    | 7.4181 -72.4431 | 16821 | 7340 | 81.99  | 203  |
| 40 | ANDES-T931      | <i>C. helianthea</i> | <i>tamai</i>      | F | IAvH14836    | 7.4181 -72.4431 | 16837 | 5108 | 54.45  | 136  |
| 41 | IAvH-CT11474    | <i>C. helianthea</i> | <i>tamai</i>      | M | IAvH14915    | 7.4181 -72.4431 | 16849 | 5826 | 70.95  | 168  |
| 42 | IAvH-CT11511    | <i>C. helianthea</i> | <i>tamai</i>      | F | IAvH14912    | 7.4181 -72.4431 | 16834 | 5732 | 71.67  | 297  |
| 43 | ANDES-T933      | <i>C. helianthea</i> | <i>tamai</i>      | M | IAvH14964    | 7.4032 -72.4415 | 16836 | 9143 | 99.15  | 270  |
| 44 | ANDES-T940      | <i>C. helianthea</i> | <i>tamai</i>      | M | IAvH14971    | 7.4032 -72.4415 | 16832 | 7118 | 77.56  | 229  |
| 45 | ANDES-T170      | <i>C. helianthea</i> | <i>tamai</i>      | M | IAvHA8406    | 7.3042 -72.3711 | 16821 | 4771 | 54.85  | 274  |
| 46 | ANDES-T1570     | <i>C. helianthea</i> | <i>tamai</i>      | M | ICNAves37550 | 6.7308 -72.7956 | 16816 | 5554 | 59.6   | 140  |

5

6 **Table S2. Variant sites in the *C. bonapartei* and *C. helianthea* alignment.** Excel file.
